# Supplementary material for: Retinoic acid and TGF-β signalling cooperate to overcome MYCN-induced retinoid resistance
Source: Genome Med. 2017 Feb 10;9:15. doi: 10.1186/s13073-017-0407-3 (PMC5303304; doi:10.1186/s13073-017-0407-3)
Supplement: Additional file 6: Table S5. — Top 100 ITRs per treatment, as identified by IPA from the RNA-seq data. (XLSX 100 kb) [file 13073_2017_407_MOESM6_ESM.xlsx]

## Sheet: Sheet1
Table S5. Top 100 ITRs per treatment, as identified by IPA from the RNA-seq data. Each treatment was
compared with the control SY5Y-MYCN cells.
Inferred Transcriptional Regulator (ITR)	p-value of overlap	Activation z-score
24h RA
beta-estradiol	2.39e-25	1.289
tretinoin	6.1e-23	4.556
HIF1A	4.3e-21	3.107
forskolin	9.21e-19	0.981
APP	1.12e-18	1.974
LY294002	2.66e-17	-0.81
dexamethasone	3.11e-17	0.41
TGFB1	1.38e-16	2.854
FGF2	1.86e-16	1.368
FSH	2.02e-16	0.207
TNF	1.23e-15	1.772
trichostatin A	1.66e-15	0.245
Cg	1.83e-15	0.601
PDGF BB	3.55e-15	2.694
bucladesine	5.92e-15	0.034
TP53	3.25e-14	-0.624
salirasib	3.47e-14	-4.101
EGF	6.03e-14	0.841
SP1	1.2e-13	0.551
D-glucose	1.4e-13	1.383
U0126	6.19e-13	-3.095
deferoxamine	1.63e-12	2.213
HRAS	1.93e-12	0.308
AGT	2.15e-12	2.486
Insulin	2.77e-12	1.865
ERBB2	3.45e-12	0.896
progesterone	5.46e-12	-0.012
HTT	8.25e-12	1.042
POU4F1	3.38e-11	1.152
ESR1	4.69e-11	1.475
MYCN	6.55e-11	-0.447
Hdac	8.11e-11	-0.173
TAZ	8.49e-11
PD98059	9.57e-11	-0.919
BDNF	1.05e-10	0.45
F2	1.19e-10	0.105
cycloheximide	1.61e-10	0.066
phorbol myristate acetate	1.76e-10	1.813
cyclic AMP	1.92e-10	0.896
EPAS1	2.03e-10	-0.167
valproic acid	2.55e-10	-1.31
actinomycin D	2.8e-10	-0.893
EGFR	3.44e-10	-0.434
NGF	3.65e-10	1.099
SB 216763	4.71e-10	1.037
Growth hormone	4.95e-10	-0.743
ethanol	8.08e-10	1.582
tamoxifen	1.13e-09	1.75
COMMD1	1.42e-09	-2.345
SP3	1.53e-09	-0.053
bexarotene	1.55e-09	2.218
MYC	1.73e-09	0.818
PTH	1.91e-09	-0.993
KMT2A	2.23e-09	2.36
HSPA9	2.42e-09	2.975
topotecan	2.45e-09	2.11
butyric acid	3.17e-09	-0.109
COL18A1	3.73e-09	-1.445
DICER1	5.53e-09	-1.813
RAF1	6.84e-09	0.541
CTNNB1	7.26e-09	-0.805
NRG1	7.52e-09	-0.216
NFKBIA	7.59e-09	0.857
REST	8.62e-09	1.774
kainic acid	9.2e-09	1.5
mifepristone	9.35e-09	1.209
NR3C1	9.51e-09	0.44
dihydrotestosterone	9.97e-09	-1.505
FOS	1.09e-08	0.907
Ca2+	1.11e-08	0.953
Akt	1.31e-08	1.328
VEGFA	1.57e-08	0.623
PDX1	2.03e-08	0.196
paclitaxel	2.18e-08	1.09
EDN1	2.75e-08	0.185
decitabine	3.09e-08	0.072
Tgf beta	3.17e-08	1.673
IGF1	3.17e-08	1.383
AKT1	3.45e-08	1.311
L-triiodothyronine	4.5e-08	-0.246
nicotine	5.5e-08	0.596
ISL1	5.93e-08	0.676
KLF2	6.68e-08	-0.487
NFkB (complex)	7.41e-08	1.229
isobutylmethylxanthine	7.48e-08	0.081
MYB	8.16e-08	-1.869
Ins1	1.01e-07	1.277
IL1B	1.21e-07	1.111
Laminin	1.23e-07	-0.096
CTGF	1.24e-07	0.279
PSEN1	1.25e-07	0.556
IL5	1.25e-07	3.448
IFNG	1.37e-07	1.38
5-N-ethylcarboxamido adenosine	1.42e-07	-1.291
isotretinoin	1.44e-07	1.07
estrogen receptor	1.45e-07	-0.804
P38 MAPK	1.71e-07	1.302
KLF4	1.78e-07	-0.362
ERK1/2	1.94e-07	1.442
Vegf	2.18e-07	1.281
24h RA & 48h Dox
beta-estradiol	2.32e-27	1.049
TGFB1	4.7e-22	-1.405
tretinoin	2.19e-20	2.275
HIF1A	1.62e-16	0.559
forskolin	3.72e-16	-1.544
TNF	6.72e-16	0.098
APP	8.32e-15	0.13
dexamethasone	1.93e-14	-0.801
progesterone	3.67e-14	-1.936
CTNNB1	9.06e-14	-2.25
TP53	2.36e-13	-1.714
Alpha catenin	5.62e-13	0.311
POU4F1	1.29e-12	1.221
HTT	1.48e-12	-0.233
decitabine	1.57e-12	-1.814
LY294002	2.15e-12	0.522
EGF	4.14e-12	-0.427
WNT3A	5.19e-12	-0.371
Tgf beta	1.16e-11	-0.842
ESR1	1.17e-11	1.288
SP1	2.14e-11	-1.314
trichostatin A	2.65e-11	-1.658
FGF2	3.02e-11	-0.101
Cg	4.66e-11	0.415
PD98059	5.39e-11	0.383
bucladesine	1.3e-10	-0.56
Vegf	1.33e-10	-2.18
HRAS	1.33e-10	0.089
ethanol	1.46e-10	0.747
HSPA9	1.58e-10	2.975
MYCN	2.94e-10	3.149
MYC	3.71e-10	2.034
ERBB2	1.02e-09	-0.421
IL1B	1.21e-09	-1.481
nicotine	1.52e-09	-2.197
AGT	1.62e-09	0.439
estrogen receptor	2.52e-09	-0.232
actinomycin D	3.04e-09	0.465
FSH	3.16e-09	-0.583
NRG1	3.31e-09	-1.102
mifepristone	5.94e-09	1.127
tamoxifen	6.56e-09	1.614
lipopolysaccharide	7.65e-09	-1.069
cycloheximide	7.67e-09	0.758
bexarotene	1.18e-08	1.789
dihydrotestosterone	1.27e-08	-2.641
PTH	1.79e-08	-0.961
PI3K (complex)	1.83e-08	-1.434
D-glucose	1.9e-08	0.437
PHOX2A	2.24e-08	-1.461
ADCYAP1	2.44e-08	0.834
GDF2	2.52e-08	-1.442
IFNG	3.92e-08	-0.22
HGF	4.12e-08	-2.306
Hdac	4.21e-08	0.168
NGF	4.8e-08	-1.655
ARNT	5.47e-08	1.539
butyric acid	5.65e-08	-0.601
SHH	6.16e-08	-0.439
SOX2	7.15e-08	0.411
TGFB3	8.52e-08	-0.924
ISL1	1.1e-07	0.724
phorbol myristate acetate	1.23e-07	0.408
PDX1	1.24e-07	-1.238
RBPJ	1.36e-07	0.917
CXCR4	1.45e-07	-2.137
ATN1	1.48e-07
TCF4	1.74e-07	-1.013
Am 580	2.23e-07	2.793
WNT5A	2.25e-07	-0.082
5-azacytidine	2.57e-07	0.081
LIPE	2.84e-07	1.091
topotecan	3.03e-07	1
RARA	3.16e-07	2.743
P38 MAPK	3.23e-07	-0.964
TP63	3.64e-07	1.851
NFKBIA	3.91e-07	-0.528
TAZ	4.08e-07
TWIST1	4.13e-07	-0.868
PRL	4.87e-07	-1.693
CD3	5.15e-07	0.349
NFkB (complex)	5.4e-07	-0.539
PGR	5.87e-07	-2.769
FGF1	6.68e-07	0.12
BMP2	6.94e-07	-0.668
Smad2/3-Smad4	7.97e-07	-0.896
SMAD4	8.01e-07	-1.067
BMP4	8.18e-07	-0.78
methylprednisolone	9.4e-07	0.277
IKBKB	9.5e-07	0.528
CTGF	1.02e-06	-1.145
CREB1	1.07e-06	0.437
SB 216763	1.15e-06	-0.342
Creb	1.17e-06	-1.06
F2	1.21e-06	-1.739
hydrogen peroxide	1.3e-06	-0.928
NOTCH1	1.31e-06	0.187
Laminin	1.41e-06	0.115
thyroid hormone	1.52e-06	-0.803
deferoxamine	1.52e-06	1.546
48h Dox
MYC	6.32E-24	6.106
APP	1.74E-23	-1.978
beta-estradiol	1.14E-16	-1.221
HIF1A	1.17E-16	-1.473
MYCN	2.21E-16	4.473
TGFB1	2.95E-14	-4.922
HTT	6.05E-14	-1.287
5-fluorouracil	2.03E-12	-4.153
tretinoin	4.26E-12	-4.147
CD 437	5.29E-12	-4.528
dihydrotestosterone	7.04E-12	-3.127
MAPT	9.60E-12	0.218
SP1	5.83E-11	-0.49
FGF2	6.88E-11	-3.515
TGFB3	8.13E-11	-3.538
NGF	9.59E-10	-3.63
dexamethasone	1.31E-09	-2.299
sirolimus	1.52E-09	-0.79
TNF	1.88E-09	-2.99
CTNNB1	2.75E-09	-1.999
EGF	2.82E-09	-4.071
CD3	4.09E-09	-2.733
EIF2AK3	4.29E-09	-1.273
PSEN1	4.85E-09	0.612
tanespimycin	5.84E-09	-1.345
FGF1	1.27E-08	-1.323
methylselenic acid	1.45E-08
E2F1	1.65E-08	0.561
methylprednisolone	1.78E-08	1.206
SP3	1.91E-08	0.047
nitric oxide	3.31E-08	-1.311
Insulin	3.84E-08	-0.183
BRD4	7.53E-08	2.548
LMNB1	7.93E-08
TP53	9.57E-08	-2.027
RCE1	1.05E-07
FN1	1.08E-07	-2.734
D-glucose	1.33E-07	-2.373
ESR1	1.41E-07	-1.335
LY294002	1.49E-07	2.941
hydrogen peroxide	1.61E-07	-1.092
Alpha catenin	1.63E-07	2.882
actinonin	1.69E-07	-1.134
SYVN1	1.88E-07	-0.229
ERBB2	2.52E-07	-1.756
PDGF BB	3.24E-07	-3.519
HRAS	3.64E-07	-0.19
SOX10	4.37E-07	-0.792
PI3K (complex)	4.39E-07	-2.118
gentamicin	5.09E-07	1.569
forskolin	5.41E-07	-3.422
BDNF	5.62E-07	-2.735
F2	6.44E-07	-2.204
MAX	7.32E-07	1.387
DICER1	8.13E-07	1.327
FOXO3	8.99E-07	-1.83
halofuginone	9.93E-07
ethanol	1.13E-06	-0.688
5-azacytidine	1.17E-06	-1.861
PGR	1.24E-06	-1.338
okadaic acid	1.34E-06	-0.636
nitrofurantoin	1.46E-06	1.243
estrogen receptor	1.48E-06	0.276
bucladesine	1.68E-06	-2.41
thyroid hormone	1.79E-06	0.533
thioacetamide	1.86E-06	-2.025
dithiothreitol	1.89E-06	-2.37
Hdac	2.10E-06	1.024
LEF1	2.10E-06	0.276
fulvestrant	2.35E-06	0.787
cisplatin	2.41E-06	-2.198
AGT	2.51E-06	-2.216
VEGFA	2.53E-06	-1.111
WNT3A	2.53E-06	-1.779
AR	3.47E-06	-0.648
HGF	3.61E-06	-2.806
INSR	3.69E-06	1.41
TFAP4	3.77E-06	-1.019
lactacystin	3.87E-06	-0.342
TERT	3.95E-06	-0.152
MAP2K1	3.98E-06	-1.449
IFNG	4.29E-06	-2.027
HSPA9	4.63E-06	-1.195
NTRK1	4.63E-06	-2.236
NRG1	4.66E-06	-2.07
Ras	4.84E-06	-0.887
MAP2K1/2	5.25E-06	-2.577
SMO	5.76E-06
KRAS	5.78E-06	0.531
cigarette smoke	5.81E-06	-2.085
PD98059	5.91E-06	2.325
tunicamycin	5.92E-06	-1.403
TAZ	6.23E-06	-2
FSH	6.49E-06	-3.218
topotecan	6.62E-06	0.852
Vegf	6.71E-06	-1.533
RBL2	6.71E-06	-0.53
MXI1	6.74E-06	-1.259
camptothecin	6.77E-06	-0.16
Laminin	7.54E-06	0.943

## Sheet: Sheet2
Upstream Regulator	p-value of overlap	Activation z-score
KCN
TGFB1	2.71E-26	-6.224
ERBB2	5.50E-21	-0.561
beta-estradiol	9.84E-21	-2.467
TNF	2.51E-19	-7.129
tretinoin	8.86E-18	-6.479
dexamethasone	5.37E-17	-3.618
TAZ	2.57E-16	-1.504
estrogen receptor	3.86E-15	1.425
IFNG	4.13E-15	-5.150
decitabine	1.68E-14	-5.134
Cg	1.71E-14	-3.205
IL1B	2.10E-14	-5.563
AGT	5.13E-14	-2.094
TP53	2.34E-13	-4.031
progesterone	2.42E-13	-2.141
NEUROG1	2.43E-13	2.082
ZNF217	6.86E-13	3.157
NKX2-3	3.26E-12	2.262
HNRNPA2B1	4.06E-12
FGF2	4.08E-12	-2.735
CTNNB1	4.45E-12	-3.537
HRAS	5.25E-12	-0.862
WNT3A	1.30E-11	-2.404
F2	1.31E-11	-5.223
SP1	1.65E-11	-2.251
MAPK1	8.55E-11	1.509
GDF2	1.79E-10	-2.717
SMARCA4	2.03E-10	-2.492
PD98059	2.67E-10	2.888
PDGF BB	4.16E-10	-2.159
thioacetamide	5.75E-10	-2.753
REST	6.11E-10	2.348
actinomycin D	6.47E-10	2.127
FSH	7.68E-10	0.150
E. coli serotype 0127B8 lipopolysaccharide	8.52E-10	-1.325
forskolin	8.74E-10	-1.614
DICER1	1.26E-09	-1.298
Tgf beta	1.30E-09	-3.273
poly rI:rC-RNA	3.08E-09	-6.162
raloxifene	4.19E-09	1.631
triamcinolone acetonide	5.27E-09	0.744
KRAS	6.25E-09	2.034
lipopolysaccharide	7.10E-09	-6.370
KLF2	7.20E-09	1.104
NFKBIA	7.25E-09	-4.074
OSM	7.53E-09	-4.913
NOTCH1	8.43E-09	0.258
IGF1	8.66E-09	-2.426
SMO	1.01E-08	0.277
Calmodulin	1.04E-08	-0.131
FOS	1.15E-08	-1.878
halofuginone	1.35E-08	0.059
IFNA2	1.45E-08	-4.499
methylprednisolone	1.83E-08	0.731
RAF1	1.95E-08	-2.491
TRIM24	2.52E-08	3.513
FGFR2	2.91E-08	-0.405
MITF	2.93E-08	-3.028
ERG	3.13E-08	-2.430
camptothecin	3.39E-08	-2.391
Alpha catenin	4.04E-08	3.654
bucladesine	4.06E-08	-2.464
HIF1A	4.76E-08	-3.580
LY294002	5.57E-08	3.650
U0126	6.02E-08	3.123
VEGFA	6.11E-08	-2.404
Laminin	6.14E-08	0.735
butyric acid	7.48E-08	-0.657
GLI1	9.85E-08	-1.006
HOXC6	1.15E-07	-2.158
IL1RN	1.20E-07	2.778
HTT	1.85E-07	-0.464
ESR2	1.98E-07	-0.273
cisplatin	2.12E-07	-2.347
TGFB3	2.20E-07	-3.770
HDAC4	2.29E-07	-0.555
PGR	2.45E-07	-3.259
Hdac	2.49E-07	1.198
IKBKB	2.66E-07	-5.060
SP3	2.74E-07	-0.607
BMP6	2.92E-07	-0.496
PAX3	3.40E-07	-1.342
Akt	3.73E-07	-0.464
CCND1	3.81E-07	0.060
NR3C1	3.93E-07	-1.148
DMD	4.35E-07	0.426
mifepristone	4.38E-07	3.016
NFkB (complex)	4.48E-07	-7.012
D-glucose	4.51E-07	-1.345
cycloheximide	4.62E-07	-0.326
EGFR	5.40E-07	-1.039
POU4F1	5.69E-07	-1.386
dopamine	5.88E-07	0.210
INHA	5.88E-07	-0.994
SMAD4	6.13E-07	-1.289
estrogen	6.26E-07	-2.182
TERT	7.22E-07	-0.800
dihydrotestosterone	8.16E-07	-1.839
FGF1	8.51E-07	1.599
rosiglitazone	1.07E-06	-1.468

## Sheet: Sheet3
© 2000-2014 Ingenuity Systems, Inc. All rights reserved.
Upstream Regulator	p-value of overlap	Activation z-score
KCNR
TGFB1	9.71e-48	-7.239
TNF	5.67e-28	-7.334
ERBB2	9.72e-28	-0.926
beta-estradiol	3.81E-27	-0.710
IFNG	5.42E-26	-6.584
tretinoin	1.47E-25	-4.918
decitabine	1.62E-23	-5.091
IL1B	2.77E-23	-7.365
dexamethasone	8.96E-23	-4.017
HRAS	6.34E-22	-2.769
estrogen receptor	1.97E-21	2.983
FGF2	2.52E-20	-3.319
Cg	5.94E-20	-3.977
F2	6.35E-20	-7.403
lipopolysaccharide	1.75E-19	-8.772
NKX2-3	1.79E-19	3.666
TP53	5.32E-19	-4.827
MAPK1	5.02E-18	2.993
AGT	1.22E-16	-4.992
SMARCA4	1.84E-16	-2.136
PDGF BB	1.07E-15	-4.001
EDN1	1.93E-15	-4.254
PD98059	2.71E-15	3.487
Vegf	2.94E-15	-3.417
Tgf beta	4.60E-15	-3.642
TAZ	7.16E-15	-2.598
SP1	1.18E-14	-2.554
NFkB (complex)	4.10E-14	-6.063
HGF	6.09E-14	-2.275
ZNF217	1.28E-13	2.117
forskolin	1.36E-13	0.624
FSH	2.33E-13	0.450
NEUROG1	4.54E-13	2.000
OSM	4.91E-13	-3.594
progesterone	5.27E-13	-2.173
FAS	5.99E-13	0.485
HNRNPA2B1	7.36E-13
cisplatin	7.70E-13	-5.680
halofuginone	8.17E-13	2.086
NFKBIA	8.67E-13	-1.981
thioacetamide	8.78E-13	-4.637
DICER1	1.53E-12	0.287
E. coli serotype 0127B8 lipopolysaccharide	1.63E-12	-2.822
CTNNB1	1.69E-12	-3.222
EGF	1.99E-12	-3.527
SP3	2.22E-12	0.050
FOS	2.79E-12	-0.122
HIF1A	3.74E-12	-4.530
SBDS	4.66E-12
APP	4.90E-12	-1.815
EPAS1	4.96E-12	-2.144
GDF2	6.14E-12	-3.168
TRIM24	1.09E-11	4.471
U0126	1.75E-11	3.166
CEBPA	1.91E-11	-3.800
butyric acid	2.03E-11	-0.705
trichostatin A	3.59E-11	-1.532
camptothecin	3.81E-11	-2.803
HTT	4.33E-11	-3.675
Alpha catenin	6.30E-11	5.253
miR-124-3p (and other miRNAs w/seed AAGGCAC)	8.17E-11	6.665
PGR	9.53E-11	-1.231
TGFB2	1.04E-10	-3.143
raloxifene	1.43E-10	0.198
SYVN1	1.45E-10	-4.160
TGFB3	1.64E-10	-2.934
Lh	2.61E-10	-0.164
trans-hydroxytamoxifen	3.75E-10	1.973
EGFR	3.78E-10	-1.753
LY294002	4.09E-10	3.697
PRL	4.41E-10	-3.592
cycloheximide	4.48E-10	-1.162
INHA	4.92E-10	-0.550
bleomycin	5.64E-10	-5.820
ADCYAP1	6.06E-10	0.305
PAX3	6.31E-10	-0.259
poly rI:rC-RNA	6.55E-10	-6.036
FGF1	6.79E-10	-0.010
NOTCH1	6.92E-10	-2.522
ESR2	7.09E-10	-0.452
IL13	7.30E-10	-3.325
MITF	7.42E-10	-3.038
AR	1.03E-09	-2.716
TGFBR2	1.14E-09	-1.782
mifepristone	1.42E-09	2.253
WNT3A	1.57E-09	-2.398
KLF2	2.22E-09	2.941
ERK	2.62E-09	-4.850
Laminin	2.83E-09	0.933
FN1	2.96E-09	-3.577
SPDEF	3.50E-09	4.402
SRF	4.44E-09	-2.775
SMAD3	4.84E-09	-3.495
lomustine	4.93E-09	-4.386
D-glucose	5.74E-09	-1.669
RAF1	6.07E-09	-3.030
JUN	6.21E-09	-1.829
BDNF	6.85E-09	0.853
REST	7.20E-09	-2.542
IFNA2	7.62E-09	-5.057
EGR1	1.08E-08	-2.813
indomethacin	1.12E-08	-2.834
SMAD7	1.16E-08	3.535
Hdac	1.19E-08	0.350
estrogen	1.21E-08	-0.475
GATA4	1.87E-08	-1.146
actinomycin D	1.89E-08	3.209
MYOCD	1.93E-08	-1.465
TREM1	2.87E-08	-3.948
lysophosphatidic acid	2.87E-08	-3.037
KRAS	2.96E-08	0.771
phorbol myristate acetate	3.03E-08	-5.231
sphingosine-1-phosphate	3.58E-08	-1.746
Retnlb	4.24E-08	-4.031
GNA15	5.41E-08
captopril	6.19E-08	-0.977
SMAD4	6.64E-08	-3.301
NR3C1	6.84E-08	-0.502
CLDN7	8.27E-08	-0.540
FBXW7	9.30E-08	1.879
HDAC4	1.01E-07	-0.816
Akt	1.24E-07	-3.129
TERT	1.39E-07	-0.351
MYC	1.72E-07	5.123
Pdgf (complex)	1.73E-07	-2.249
losartan potassium	1.80E-07	4.699
AHR	1.82E-07	1.978
STAT3	1.85E-07	-4.804
5-azacytidine	1.87E-07	-4.518
Nfat (family)	2.00E-07	-5.048
CR1L	2.06E-07	3.497
ATN1	2.23E-07
NRXN1	2.41E-07
ERK1/2	2.43E-07	-3.726
BMP2	2.45E-07	-3.522
IGF1	2.53E-07	-1.264
APOE	2.61E-07	3.523
HAND2	2.63E-07	-0.369
fenamic acid	2.66E-07	-4.342
simvastatin	2.76E-07	1.140
bexarotene	3.19E-07	-1.377
triamterene	3.37E-07	-4.191
phenacetin	3.50E-07	-3.588
COL4A3	3.73E-07
bucladesine	3.99E-07	-1.135
prostaglandin E2	4.22E-07	-2.079
IFNL1	4.29E-07	-3.802
PTH	4.93E-07	-1.795
IRS1	5.37E-07	-0.201
Jnk	5.38E-07	-3.908
TAF4	5.50E-07	2.520
IL6	5.62E-07	-3.995
Pkc(s)	6.10E-07	-2.812
triamcinolone acetonide	7.15E-07	0.479
bisindolylmaleimide I	7.57E-07	2.933
nifedipine	7.82E-07	0.450
Hedgehog	8.27E-07	-0.694
leukotriene D4	8.27E-07	-3.627
SB203580	9.38E-07	6.345
MEF2C	9.76E-07	1.177
TGM2	1.00E-06	-4.076
Growth hormone	1.07E-06	-0.690
VEGFA	1.11E-06	-2.630
KIAA1524	1.15E-06	0.690
MGEA5	1.19E-06	0.250
GLI1	1.19E-06	-1.612
IKZF1	1.21E-06	1.695
F2R	1.24E-06	-3.950
IL4	1.25E-06	-2.462
Rock	1.27E-06	-2.226
Ifnar	1.28E-06	-4.833
P38 MAPK	1.42E-06	-3.298
lysophosphatidylcholine	1.42E-06	-0.312
methylprednisolone	1.43E-06	-0.408
wortmannin	1.47E-06	2.567
kainic acid	1.62E-06	-1.029
gentamicin C	1.66E-06	-3.922
doxorubicin	1.66E-06	-5.157
Salmonella enterica serotype abortus equi lipopolysaccharide	1.71E-06	-4.709
ERBB4	1.73E-06	2.241
IL1RN	1.98E-06	3.391
STAT4	2.03E-06	-4.565
FGFR2	2.14E-06	-2.870
PRDM5	2.21E-06	-1.890
vancomycin	2.27E-06	-4.033
BMP6	2.32E-06	-1.876
FANCC	2.32E-06
nitrofen	2.41E-06	2.261
DMD	2.52E-06	-1.463
carbon tetrachloride	2.52E-06	-4.551
hexachlorobenzene	2.70E-06	-4.484
aldosterone	2.74E-06	-3.371
GnRH-A	2.76E-06	-1.937
SP600125	2.78E-06	4.085
Agtr1b	2.90E-06	0.728
TBX5	3.05E-06	-0.342
fulvestrant	3.39E-06	-2.386
LMNB1	3.39E-06
dihydrotestosterone	3.42E-06	-0.771
PTK2	3.59E-06	-3.348
SMO	3.60E-06	0.277
ERG	3.60E-06	-3.359
WT1	3.86E-06	-0.844
VHL	3.99E-06	0.535
TCF4	4.32E-06	-1.559
inosine	4.32E-06	-3.851
ESR1	4.66E-06	-0.914
FBN1	4.91E-06	3.420
vitamin K2	4.91E-06	-2.915
PTEN	5.24E-06	-1.365
cholesterol	5.24E-06	-1.461
hydrogen peroxide	5.28E-06	-5.076
NRG1	5.34E-06	-1.574
RCE1	5.37E-06
SHH	5.76E-06	-0.318
tacrolimus	6.10E-06	-0.183
PPARG	6.62E-06	-0.882
IL11	6.75E-06	-1.902
androgen	6.84E-06	-0.538
dinoprost	6.99E-06	-1.431
allopurinol	7.13E-06	-4.017
metribolone	7.18E-06	0.125
TP63	7.91E-06	-0.176
AKT1	8.23E-06	-0.759
tributyrin	8.47E-06	-4.208
IKBKB	8.81E-06	-3.837
S1PR2	8.87E-06	-2.216
cyclic AMP	9.14E-06	-1.819
rosiglitazone	9.30E-06	-0.164
calcitriol	1.00E-05	-3.237
miR-1 (and other miRNAs w/seed GGAAUGU)	1.00E-05	4.991
stallimycin	1.01E-05	-2.573
Sn50 peptide	1.02E-05	1.508
LIPE	1.03E-05	0.132
ramipril	1.07E-05	3.208
IFNB1	1.09E-05	-1.927
TNC	1.10E-05	-1.603
ethanol	1.13E-05	-1.847
NGF	1.18E-05	-1.231
CHUK	1.18E-05	-2.168
MAPK14	1.20E-05	-4.745
Hmga1	1.24E-05	0.326
POU4F1	1.24E-05	-0.019
bromodeoxyuridine	1.32E-05	-3.432
ADRB	1.53E-05	0.919
Ro31-8220	1.57E-05	3.238
MAP2K1	1.58E-05	-3.724
tyrphostin AG 1478	1.59E-05	2.943
CREB1	1.63E-05	-0.794
mycophenolic acid	1.63E-05	-3.603
SMAD2	1.63E-05	-3.437
BMP4	1.66E-05	-0.793
YAP1	1.68E-05	-2.795
cocaine	1.73E-05	-4.274
SERCA	1.73E-05	1.715
eprosartan	1.73E-05	1.664
dopamine	1.74E-05	-0.221
LDL	1.82E-05	-3.235
RB1	1.84E-05	-1.483
Sos	1.90E-05
SF1	1.92E-05	0.375
AEBP1	1.92E-05	-0.342
R5020	2.09E-05	-0.338
hyaluronic acid	2.32E-05	-2.563
SMAD1	2.33E-05	-2.781
HOXC6	2.38E-05	-1.118
farnesylthiosalicylic acid	2.42E-05	1.600
tamoxifen	2.42E-05	-2.766
Ca2+	2.57E-05	-2.137
CDKN1B	2.58E-05	0.296
plicamycin	2.66E-05	2.518
Go6983	2.76E-05	1.054
icatibant	2.76E-05	0.113
ACVRL1	2.77E-05	-0.149
benzo(a)pyrene	2.81E-05	-2.029
CEBPB	2.84E-05	-2.988
lithium chloride	2.92E-05	-0.649
paclitaxel	2.92E-05	-1.639
CSF1	2.92E-05	-4.034
NKX2-5	2.97E-05	-0.761
PI3K (family)	3.13E-05	-1.664
RARA	3.43E-05	-0.281
MKL1	3.43E-05	-3.102
FGF8	3.54E-05	1.593
CNTF	3.66E-05	-1.796
cerivastatin	3.76E-05	1.749
N-Ac-Leu-Leu-norleucinal	3.76E-05	1.192
Fibrin	3.91E-05	0.000
riboflavin	3.95E-05	-1.508
IGF2BP1	3.95E-05	-2.704
HOXD3	3.95E-05	-2.714
15-deoxy-delta-12,14 -PGJ 2	4.17E-05	1.661
hydrocortisone	4.29E-05	0.883
DCN	4.43E-05	-1.499
SRC (family)	4.47E-05	-3.083
CSF2	4.60E-05	-3.930
MTPN	4.71E-05	-4.785
Mapk	4.86E-05	-1.407
FOXA1	4.88E-05	1.286
RELA	5.02E-05	-3.307
JAG1	5.31E-05	-0.786
ABCB4	5.31E-05	3.573
IRF3	5.35E-05	-3.680
BMP7	5.52E-05	-0.311
deferoxamine	5.66E-05	-2.427
Ap1	5.66E-05	-2.969
EIF2AK2	6.03E-05	-3.324
SOX2	6.05E-05	0.512
cyanocobalamin	6.19E-05	-0.962
FGF10	6.20E-05	-2.344
IL1A	6.22E-05	-4.665
NFKB1	6.41E-05	-3.366
epigallocatechin-gallate	7.36E-05	2.188
DGCR8	7.41E-05	-1.331
8-bromo-cAMP	7.83E-05	-0.048
App	8.10E-05	-0.989
PSEN1	8.13E-05	0.541
HOXC8	8.48E-05	1.183
eplerenone	8.48E-05	2.721
GDF9	8.48E-05	-2.062
enalapril	8.56E-05	-0.652
phenylbutazone	8.97E-05	-3.952
isobutylmethylxanthine	9.00E-05	-1.108
atorvastatin	9.03E-05	1.869
Pka	9.03E-05	-1.442
IRF7	9.67E-05	-5.134
TFAP2A	9.70E-05	-0.692
amphetamine	9.70E-05	-0.962
L-type Calcium Channel	1.05E-04	-0.115
bevacizumab	1.05E-04	-0.640
RARG	1.06E-04	-1.311
salmonella minnesota R595 lipopolysaccharides	1.07E-04	-4.376
ITGB1	1.07E-04	-1.518
AG490	1.07E-04	3.262
Interferon alpha	1.09E-04	-6.476
TP73	1.12E-04	-3.524
gefitinib	1.12E-04	0.384
SMARCA2	1.12E-04	-0.616
omeprazole	1.12E-04
PITX2	1.17E-04	-0.508
heparin	1.18E-04	0.357
Collagen type I	1.18E-04	-3.389
Calmodulin	1.19E-04	0.649
INHBA	1.19E-04	-1.976
spironolactone	1.19E-04	0.513
miR-29b-3p (and other miRNAs w/seed AGCACCA)	1.19E-04	3.203
EDNRA	1.20E-04	-2.646
TCF	1.22E-04	-1.400
carbamylcholine	1.23E-04	-0.471
AGTR1	1.23E-04	-0.951
MECOM	1.35E-04	0.555
Collagen type IV	1.35E-04	-0.632
NFAT (complex)	1.35E-04	-1.414
cyclosporin A	1.38E-04	-1.880
Histone h3	1.40E-04	-0.651
BDKRB2	1.42E-04	1.832
CYP2J2	1.42E-04	0.335
GLIS2	1.44E-04
PROC	1.48E-04	1.227
IL5	1.55E-04	-3.532
HOXD10	1.57E-04	-0.489
WISP2	1.58E-04	0.971
mir-133	1.58E-04	0.938
CTF1	1.62E-04	-1.123
ERBB3	1.62E-04	0.625
mibolerone	1.68E-04	2.698
PI3K (complex)	1.75E-04	-2.155
PRKCD	1.76E-04	-2.473
CDKN2A	1.77E-04	-2.748
MEOX2	1.78E-04	3.487
SOD1	1.79E-04	1.026
arsenite	1.85E-04	-1.187
HMOX1	1.90E-04	0.839
RHOA	1.91E-04	-1.039
CD38	1.91E-04	-1.899
fasudil	1.93E-04	2.481
IL17A	1.94E-04	-2.107
troglitazone	1.98E-04	1.534
F7	2.00E-04	-3.173
PDGFB	2.09E-04	-2.228
N-nitro-L-arginine methyl ester	2.17E-04	-1.365
PTGS2	2.25E-04	-2.413
cholic acid	2.30E-04	-2.152
NOV	2.30E-04	0.365
SEMA7A	2.30E-04	-3.317
HDAC1	2.49E-04	-0.311
GLI3	2.53E-04	-1.446
Notch	2.65E-04	-2.524
farnesyl pyrophosphate	2.68E-04	-1.977
CD44	2.70E-04	-3.140
ISL1	2.71E-04	-0.637
HIC1	2.73E-04	0.337
phenylephrine	2.73E-04	-2.168
lactacystin	2.77E-04	-1.930
INHBB	2.78E-04	-2.178
PDX1	2.88E-04	-0.686
ATP	2.98E-04	0.137
RET	3.01E-04	-0.774
fluoxetine	3.07E-04	-0.332
NPR1	3.10E-04	2.744
LEPR	3.12E-04	-0.000
Ifn	3.20E-04	-4.729
HDAC2	3.24E-04	-1.303
IL10	3.27E-04	-0.941
corticosterone	3.27E-04	0.005
GATA1	3.36E-04	-0.383
potassium chloride	3.36E-04	1.010
let-7	3.41E-04	0.769
TNFSF11	3.46E-04	-3.991
MAPT	3.47E-04	-1.667
COL18A1	3.54E-04	3.749
WNT5A	3.62E-04	-0.898
VTN	3.77E-04	-2.557
EGR2	3.82E-04	-0.373
TCF3	3.82E-04	-0.638
SFTPA1	3.86E-04	4.085
CREM	4.01E-04	0.172
(+)-MK-801	4.10E-04	1.405
NR4A1	4.18E-04	1.816
LMNA	4.25E-04	0.692
PKD1	4.26E-04	1.031
SKI	4.46E-04	-0.462
F10	4.46E-04	-1.994
mir-34	4.65E-04	0.511
CYR61	4.65E-04	-1.589
TAF4B	4.77E-04	-2.125
rifampin	4.86E-04	-3.497
NPC1	4.86E-04	0.754
curcumin	4.92E-04	3.616
RTN4	4.95E-04	0.000
APBB1	5.03E-04	-2.000
piceatannol	5.06E-04	0.896
JUN/JUNB/JUND	5.06E-04	0.283
oxysterol	5.06E-04	-0.267
ACSL5	5.06E-04	-1.000
arecoline	5.06E-04	-1.334
NT5E	5.37E-04	0.816
miR-7a-5p (and other miRNAs w/seed GGAAGAC)	5.37E-04	0.811
ALDH1A2	5.55E-04	2.514
DES	5.60E-04	1.507
alpha-ketoisocaproic acid	5.60E-04	-0.246
thioinosine	5.60E-04
MPL	5.60E-04
quinapril	5.60E-04	2.213
5-(3-chloro-4-(2,3-dihydroxy-propoxy)benzylidene)-2-propylimino-3-o-tolyl-thiazolidin-4-one	5.60E-04	-2.236
RAC1	5.77E-04	-1.637
TCR	5.79E-04	-1.541
Y 27632	5.80E-04	1.447
AGER	5.80E-04	-1.108
Tnf (family)	5.81E-04	-3.647
LIF	5.93E-04	-2.205
ARRB1	5.95E-04	-0.896
pimagedine	6.10E-04	2.130
Creb	6.12E-04	-0.705
haloperidol	6.25E-04	-0.960
SB 216763	6.44E-04	-0.249
D-galactosamine	6.44E-04	-3.203
ethionine	6.44E-04	-3.860
IRF1	6.49E-04	-2.327
Go 6976	6.52E-04	1.886
DKK1	6.60E-04	0.123
NTRK2	6.60E-04	-0.508
DETA-NONOate	6.61E-04	-2.079
NSC719239	6.71E-04	1.982
GAL3ST1	6.71E-04	1.974
SGCB	6.71E-04	-1.982
SERPINE2	6.71E-04
GRIA2	6.71E-04
methylselenic acid	6.75E-04	-0.816
PARP1	6.80E-04	-0.356
eicosapentenoic acid	6.80E-04	-1.589
TNFSF10	6.80E-04	-2.739
RNA polymerase II	6.86E-04
TGFBR1	6.89E-04	-3.078
NANOG	6.92E-04	-0.231
ENG	7.13E-04	0.825
PRKG1	7.13E-04	-1.254
miR-27a-3p (and other miRNAs w/seed UCACAGU)	7.13E-04	2.433
crocidolite asbestos	7.13E-04	-2.780
CD40LG	7.18E-04	-3.797
miR-292-5p (and other miRNAs w/seed CUCAAAC)	7.29E-04	-0.508
calphostin C	7.34E-04	2.459
OTX2	7.34E-04	-2.385
nitric oxide	7.68E-04	-1.150
cobalt chloride	7.77E-04	-1.212
5-hydroxytryptamine	7.77E-04	-2.136
KDR	7.98E-04	-1.673
Am 580	7.98E-04	-1.747
cilostazol	7.98E-04	2.751
NKX2-1	8.15E-04	-0.895
Pro-inflammatory Cytokine	8.16E-04	-2.209
carbonyl cyanide m-chlorophenyl hydrazone	8.48E-04	-1.006
ZBTB16	8.51E-04	-1.471
HTATIP2	8.68E-04	1.944
NAB2	8.68E-04	2.767
NR3C2	8.88E-04	0.378
pyrrolidine dithiocarbamate	8.88E-04	2.720
IGF2	8.98E-04	-1.713
KMT2D	9.09E-04	-0.739
irbesartan	9.09E-04	2.419
mGluR	9.35E-04	-0.128
MSGN1	9.35E-04	-1.342
8,9-epoxyeicosatrienoic acid	9.35E-04	-1.664
SOX5	9.35E-04
IKBKG	9.40E-04	-3.017
24-hydroxycholesterol	9.88E-04	-0.153
Pdgf Ab	9.88E-04	-0.455
NREP	9.88E-04	-0.484
pyridoxine	9.88E-04	-1.414
RBPJ	9.99E-04	0.988
CXCL12	1.01E-03	-2.973
RGS2	1.04E-03	-0.378
glycerol	1.04E-03	-0.798
mannose	1.04E-03	-1.890
VGLL3	1.04E-03	-2.646
IDH1	1.04E-03	0.000
HOXA9	1.05E-03	-0.829
prednisolone	1.07E-03	1.000
PAX6	1.08E-03	1.061
glucagon	1.09E-03	-0.044
miR-145-5p (and other miRNAs w/seed UCCAGUU)	1.09E-03	2.196
H89	1.10E-03	-0.235
HDL	1.12E-03	0.712
HBEGF	1.12E-03	-0.727
HLX	1.12E-03	3.089
pioglitazone	1.13E-03	1.255
miR-204-5p (and other miRNAs w/seed UCCCUUU)	1.14E-03	1.929
ilomastat	1.14E-03	0.534
risperidone	1.14E-03	0.128
AREG/AREGB	1.14E-03	-2.420
NEUROG3	1.15E-03	1.323
baicalin	1.17E-03	-0.203
ACVR1	1.17E-03
valsartan	1.17E-03	3.080
LEP	1.18E-03	-2.722
BMI1	1.18E-03
valproic acid	1.20E-03	0.344
MKL2	1.22E-03	-1.134
5-N-ethylcarboxamido adenosine	1.29E-03	-1.257
PAX7	1.31E-03	-0.641
RHO	1.32E-03	0.688
ETS2	1.32E-03	-2.420
ciglitazone	1.34E-03	1.079
bisindolylmaleimide	1.35E-03	1.343
STAT6	1.36E-03	-1.825
MAP3K1	1.40E-03	-3.300
ketamine	1.41E-03	1.178
ETS	1.41E-03
Ras homolog	1.41E-03	-2.588
5-O-mycolyl-beta-araf-(1->2)-5-O-mycolyl-alpha-araf-(1->1')-glycerol	1.47E-03	-3.415
thalidomide	1.48E-03	2.543
nitrofurantoin	1.50E-03	-0.837
PPARD	1.52E-03	-1.112
MYOD1	1.52E-03	-0.422
dimethylnitrosamine	1.53E-03	-1.845
XDH	1.55E-03	0.413
conjugated linoleic acid	1.55E-03	-0.213
SNAI2	1.57E-03	-0.406
SOX11	1.61E-03	0.978
miR-155-5p (miRNAs w/seed UAAUGCU)	1.65E-03	3.414
USF2	1.65E-03	-2.382
20alpha-hydroxycholesterol	1.70E-03	1.067
MGP	1.70E-03	0.600
2-amino-5-phosphonovaleric acid	1.70E-03	0.562
harmine	1.70E-03	0.447
PRDM8	1.70E-03	-0.447
Collagen type III	1.70E-03	-0.796
TARBP2	1.70E-03	-1.342
zimelidine	1.70E-03	-1.342
ZNF652	1.70E-03
N,N-dimethylarginine	1.70E-03
miR-138-5p (miRNAs w/seed GCUGGUG)	1.70E-03	2.201
KDM3A	1.70E-03	-2.219
FAM3B	1.73E-03
SND1	1.73E-03
pravastatin	1.77E-03	1.762
PLAG1	1.77E-03	-0.074
TCF12	1.77E-03	-0.896
isotretinoin	1.78E-03	-2.518
medroxyprogesterone acetate	1.85E-03	-0.595
norepinephrine	1.88E-03	-1.392
oleic acid	1.89E-03	0.657
NDN	1.94E-03	1.937
mir-30	1.94E-03	1.501
RELN	1.94E-03	0.391
COL1A1	1.94E-03	-0.391
anisomycin	1.97E-03	-0.182
MYCN	1.98E-03	5.289
SRC	1.99E-03	-2.399
Actin	2.02E-03	0.000
WWC1	2.02E-03	0.000
MAML1	2.02E-03	-0.242
PRKRA	2.02E-03	-1.633
ZFP57	2.02E-03
ACKR3	2.02E-03
NPC2	2.02E-03
PHF21A	2.02E-03	2.442
CHRM3	2.02E-03	-2.213
MMP2	2.05E-03	-2.029
PRNP	2.10E-03	-2.433
mir-145	2.11E-03	0.076
dextran sulfate	2.13E-03	-2.236
POSTN	2.21E-03	-0.342
11,12-epoxyeicosatrienoic acid	2.21E-03	-0.800
ZNF202	2.21E-03
NUPR1	2.30E-03	0.244
3-deazaneplanocin	2.38E-03	-2.111
PRKCA	2.39E-03	-1.496
PRKAG3	2.43E-03
methotrexate	2.44E-03	-1.221
CDH1	2.52E-03	1.119
cadmium chloride	2.52E-03	-1.012
GJA1	2.55E-03	0.714
arotinoid acid	2.55E-03	-0.447
miR-30c-5p (and other miRNAs w/seed GUAAACA)	2.59E-03	1.913
Insulin	2.60E-03	-1.557
CALCA	2.64E-03	0.121
HAND1	2.76E-03	0.378
DAG1	2.76E-03	0.294
dipyridamole	2.76E-03	2.646
RETN	2.76E-03	-2.495
carbon monoxide	2.76E-03	1.298
clozapine	2.76E-03	-0.218
PLN	2.76E-03
glucocorticoid	2.81E-03	-0.826
HDAC5	2.83E-03	-0.817
KLF6	2.83E-03	-2.483
NEDD9	2.83E-03	-2.496
NLRP12	2.83E-03	-1.566
TRAF2	2.85E-03	-0.600
USF1	2.85E-03	-0.844
PPP3CA	2.86E-03
DAB1	2.92E-03	1.980
GRM3	2.92E-03	1.199
ELAVL4	2.92E-03	1.119
darusentan	2.92E-03	1.067
ATPase	2.92E-03	1.000
6-cyano-7-nitroquinoxaline-2,3-dione	2.92E-03	0.064
quisqualic acid	2.92E-03	0.022
miR-382-5p (miRNAs w/seed AAGUUGU)	2.92E-03	0.000
apamin	2.92E-03	0.000
elocalcitol	2.92E-03	-0.762
ZMIZ1	2.92E-03	-0.927
AGO2	2.92E-03	-0.970
MTF1	2.92E-03	-0.979
allosamidin	2.92E-03	-1.000
Collagen type V	2.92E-03	-1.225
Hoxc9	2.92E-03
Nr1h	2.94E-03	1.704
IL1	3.07E-03	-4.794
E2F1	3.09E-03	-0.173
IRF2	3.13E-03	0.745
PLAU	3.13E-03	-0.712
JUND	3.13E-03	-0.749
INSR	3.16E-03	1.884
L-triiodothyronine	3.25E-03	1.169
arachidonic acid	3.28E-03	-1.756
sucrose	3.31E-03	-0.277
mir-124	3.34E-03	0.266
LAMC1	3.34E-03	2.005
BMP	3.34E-03	-2.425
ADM	3.40E-03	0.320
Histone h4	3.48E-03
CXCR4	3.58E-03	-0.692
advanced glycation end-products	3.58E-03	-1.970
FOSB	3.64E-03	0.766
imipramine	3.64E-03	-1.089
ICMT	3.64E-03
dibutyl phthalate	3.64E-03	-2.090
WNT1	3.65E-03	-2.135
LDLR	3.65E-03	1.443
ITGB3	3.71E-03	-0.791
ursodeoxycholic acid	3.71E-03	-2.417
JAK1	3.72E-03	-3.471
lenalidomide	3.77E-03	-1.223
FGFR1	3.78E-03	-0.577
CCL5	3.78E-03	-1.600
U73122	3.80E-03	1.896
HDAC6	3.80E-03	-1.993
RANBP9	3.84E-03	-0.059
ITGA3	3.84E-03	-0.124
HNRNPAB	3.84E-03	-0.447
14,15-epoxyeicosatrienoic acid	3.84E-03	-1.664
LNX2	3.84E-03	-1.698
IgG	3.89E-03	1.959
MEDAG	3.93E-03	0.447
22(S)-hydroxycholesterol	3.93E-03	0.391
sphingosylphosphocholine	3.93E-03	-1.165
FOXF1	3.93E-03	-1.993
LTBP4	3.93E-03
MIA	3.93E-03	-2.232
carboplatin	4.01E-03	-2.350
resveratrol	4.04E-03	-1.116
TGFA	4.06E-03	-2.236
Tropomyosin	4.17E-03
cetylpyridinium	4.17E-03
FREM2	4.17E-03
2-(3-chlorophenylamino)phenylacetic acid	4.17E-03
HDGF	4.17E-03
DTNBP1	4.17E-03
defibrotide	4.17E-03
glucuronyl glucosamine glycan sulfate	4.17E-03
cercosporin	4.17E-03
MYH9	4.17E-03
PTPRA	4.17E-03
riociguat	4.17E-03
CYSLTR1	4.17E-03
PLA2G6	4.17E-03
PFN1	4.17E-03
STRAP	4.17E-03
TRAF7	4.17E-03
USP37	4.17E-03
RAB7A	4.17E-03
ELAVL3	4.17E-03
mecamylamine	4.17E-03
BB-2116	4.17E-03
YM 529	4.17E-03
mycophenolate mofetil	4.17E-03
Ras	4.18E-03	-1.879
LGALS3	4.19E-03	1.019
RBL1	4.19E-03	-0.076
MIF	4.19E-03	-0.452
lisinopril	4.27E-03	0.734
hydroxypropyl-beta-cyclodextrin	4.27E-03	0.594
K-252	4.27E-03	-0.788
FOXC1	4.27E-03	-1.000
miR-23a-3p (and other miRNAs w/seed UCACAUU)	4.27E-03	2.274
NOG	4.31E-03	2.058
MAPK8	4.37E-03	-2.538
caffeic acid phenethyl ester	4.38E-03	2.982
IL3	4.44E-03	-1.818
rottlerin	4.52E-03	2.390
MYD88	4.55E-03	-5.150
KDM5B	4.70E-03	1.301
bosentan	4.82E-03	1.572
MAP3K3	4.82E-03	-1.091
PGF	4.82E-03	-1.411
SOX10	4.82E-03	-1.501
E2F5	4.82E-03
ALOX15	4.82E-03	-2.242
UTP	4.82E-03	-2.581
POU4F2	4.84E-03	-2.219
ADIPOQ	4.89E-03	-0.848
MAP3K8	4.91E-03	-0.448
MAPK9	4.91E-03	-0.964
ETS1	4.96E-03	-2.974
delta-9-tetrahydrocannabinol	4.99E-03	-0.517
3,3'-diindolylmethane	4.99E-03	-1.802
DNMT3B	5.02E-03	0.143
methamphetamine	5.02E-03	-1.267
verapamil	5.03E-03	0.470
PTGS1	5.03E-03	-1.067
IL2	5.07E-03	-3.576
CCR1	5.08E-03	-0.333
CHI3L1	5.08E-03
N-acetyl-L-cysteine	5.11E-03	2.740
UPF2	5.12E-03	1.508
MEF2D	5.12E-03	-0.638
SERPINE1	5.12E-03	2.438
POU3F2	5.40E-03	2.433
TMSB4	5.40E-03	-2.607
CD3	5.42E-03	1.282
E. coli B4 lipopolysaccharide	5.44E-03	-3.905
vitamin E	5.61E-03	2.597
DYSF	5.68E-03	1.980
brefeldin A	5.82E-03	0.282
FOXC2	5.82E-03	-0.028
ID1	5.82E-03	-0.242
AVP	5.82E-03	-1.850
GATA3	5.94E-03	-1.202
NS-398	5.95E-03	0.558
JUNB	6.04E-03	-2.523
FOSL1	6.17E-03	-0.169
CTGF	6.19E-03	-2.503
ATF1	6.21E-03	-0.391
Mek	6.21E-03	-0.829
topotecan	6.22E-03	1.199
RHOJ	6.34E-03
HOXA13	6.34E-03
DARC	6.34E-03
MET	6.35E-03	-1.820
IGF1R	6.62E-03	-0.273
N,N-dimethylsphingosine	6.64E-03	0.842
quetiapine	6.64E-03	0.401
CHRM1	6.64E-03	-0.869
perhexiline	6.64E-03	-1.633
CBX3	6.64E-03
ACE2	6.64E-03	2.433
ADAM10	6.67E-03
SPARC	6.69E-03	-0.068
propylthiouracil	6.69E-03	-0.882
Relaxin	6.80E-03	-0.213
mir-126	6.80E-03	-0.256
BGN	6.80E-03	-1.334
S100A4	6.81E-03	-0.896
8-bromoguanosine 3',5'-cyclic monophosphate	6.81E-03	-1.702
naringenin	6.92E-03	1.463
DRD2	6.92E-03	-0.822
TAC1	6.95E-03	-1.437
CREBBP	6.98E-03	-1.314
PP2/AG1879 tyrosine kinase inhibitor	7.10E-03	3.096
SPP1	7.18E-03	-1.961
CD40	7.26E-03	-4.418
Collagen(s)	7.29E-03	-0.264
nitroprusside	7.29E-03	-1.645
ELK1	7.29E-03	-2.086
BSCL2	7.41E-03
geldanamycin	7.47E-03	1.206
FADD	7.47E-03	-0.111
CSF3	7.50E-03	-0.873
STAT5B	7.59E-03	1.171
Immunoglobulin	7.64E-03	2.025
itraconazole	7.64E-03	1.982
CGP 42112	7.64E-03	1.982
EN2	7.64E-03	1.067
miR-219a-5p (and other miRNAs w/seed GAUUGUC)	7.64E-03	1.067
BDKRB1	7.64E-03	1.000
CV 3988	7.64E-03	1.000
ZYX	7.64E-03	0.890
WNT10B	7.64E-03	0.152
MIB1	7.64E-03	-0.029
LMO4	7.64E-03	-0.689
tryptase	7.64E-03	-1.000
saquinavir	7.64E-03	-1.000
fluphenazine	7.64E-03	-1.172
neomycin	7.64E-03
KCNK2	7.64E-03
PRDM16	7.64E-03
RO4929097	7.64E-03
SPTAN1	7.64E-03
PMP22	7.64E-03
HOXD9	7.64E-03
betaxolol	7.64E-03
AQP11	7.64E-03	2.000
Pde	7.68E-03	0.447
LIN28B	7.68E-03	-0.152
PARP2	7.68E-03	-0.246
Ck2	7.68E-03	-0.447
NCSTN	7.68E-03	-0.943
CBX5	7.68E-03
Atrial Natriuretic Peptide	7.68E-03	2.236
MGAT3	7.68E-03	-2.219
diethylstilbestrol	7.80E-03	0.295
fluocinolone acetonide	7.87E-03	0.302
NFIB	7.87E-03
H-7	7.87E-03	2.153
STAT5A	7.88E-03	-0.048
testosterone	7.91E-03	0.580
GDNF	7.93E-03	-0.949
GH1	7.96E-03	-2.232
GFI1	8.07E-03	3.317
caffeine	8.26E-03	-0.181
SMAD6	8.29E-03	0.624
2-acetylaminofluorene	8.29E-03	-1.726
ethidium	8.29E-03
GPER1	8.29E-03	-2.556
KIT	8.29E-03
TRH	8.41E-03	-0.040
mevalonic acid	8.41E-03	-2.212
STAT	8.41E-03	-2.398
benzyloxycarbonyl-Leu-Leu-Leu aldehyde	8.58E-03	-0.900
TLR4	8.72E-03	-4.135
GATA2	8.75E-03	1.411
lovastatin	8.85E-03	2.014
ITGAV	8.89E-03	-2.145
mir-1	9.05E-03	1.917
ITGA5	9.05E-03	-1.773
PPRC1	9.05E-03	-1.921
cholecalciferol	9.07E-03	-2.201
Ro41-5253	9.10E-03	1.580
LRP6	9.10E-03	1.455
Sch-23390	9.10E-03	1.351
ATG7	9.10E-03	0.788
stearic acid	9.10E-03	0.113
HOXA5	9.10E-03	-0.585
FSHB	9.10E-03	-1.580
SMARCD3	9.10E-03	-1.890
PDGF-AA	9.10E-03	-2.214
finasteride	9.10E-03	-2.813
MTOR	9.20E-03	1.000
miR-133a-3p (and other miRNAs w/seed UUGGUCC)	9.23E-03	1.416
nitroarginine	9.23E-03	-1.969
LRP1	9.35E-03	1.757
PD 123319	9.35E-03	-1.730
MYOC	9.35E-03	-2.203
SPRY2	9.35E-03	-2.272
deoxycorticosterone acetate	9.35E-03	-2.935
trovafloxacin	9.38E-03	-3.441
T3-TR-RXR	9.85E-03	-1.022
isoproterenol	9.98E-03	-1.123
SIRT1	1.00E-02	0.248
morphine	1.00E-02	-0.273
ASCL1	1.01E-02	0.786
LEF1	1.01E-02	-1.184
YY1	1.06E-02	-1.051
Wnt	1.07E-02	0.342
PON1	1.07E-02	1.000
FABP2	1.07E-02	0.221
HSPA9	1.07E-02	-0.128
FZD8	1.07E-02	-0.956
MECP2	1.08E-02	1.801
garcinol	1.08E-02	2.711
thapsigargin	1.08E-02	-2.125
TSH	1.10E-02	-1.499
epicatechin	1.11E-02	0.676
N-methyl-D-aspartate	1.11E-02	0.594
PAF1	1.11E-02	-1.604
folic acid	1.11E-02	-2.265
CNR1	1.12E-02	-0.695
oxaliplatin	1.14E-02	-1.993
CCND1	1.18E-02	1.219
HOXA10	1.19E-02	-0.664
PP1	1.21E-02	1.027
MAPK11	1.21E-02	-1.105
bardoxolone	1.21E-02	-1.769
PLAT	1.21E-02	-2.474
let-7a-5p (and other miRNAs w/seed GAGGUAG)	1.21E-02	1.684
NFATC2	1.21E-02	-2.351
TAL1	1.21E-02
BMPER	1.22E-02	1.964
arsenic	1.22E-02	-0.128
CaMKII	1.22E-02	-0.298
ammonium chloride	1.22E-02	-1.134
calcipotriene	1.22E-02	-1.236
2-mercaptoacetate	1.22E-02	-1.982
LPL	1.22E-02	-0.616
CYP19A1	1.24E-02	1.028
DACH1	1.26E-02	1.211
CHD4	1.26E-02	0.186
TIMP1	1.26E-02	-1.000
SUPT16H	1.26E-02
Smad	1.26E-02	-2.043
leuprolide	1.27E-02	0.543
PCDH11X/PCDH11Y	1.27E-02	0.128
FABP4	1.27E-02	-0.563
INSIG1	1.27E-02	0.335
SMARCB1	1.28E-02	-2.510
POR	1.30E-02	-0.061
FOXL2	1.31E-02	-2.568
Kallikrein	1.33E-02	1.432
GFPT1	1.33E-02	0.447
pCPT-cAMP	1.33E-02	0.277
MXD1	1.33E-02	-0.283
ADAM12	1.33E-02	-0.440
PSMB9	1.33E-02	-0.492
Shc	1.33E-02	-0.600
NMNAT1	1.33E-02	-0.784
FRMD6	1.33E-02	-1.067
VIM	1.33E-02	-1.231
EPHB1	1.33E-02	-1.432
BCL6B	1.33E-02	-1.477
alprazolam	1.33E-02
calmidazolium	1.33E-02	2.200
FYN	1.35E-02	-0.396
TFAP2C	1.35E-02	2.934
nicotine	1.36E-02	-0.198
miR-17-5p (and other miRNAs w/seed AAAGUGC)	1.39E-02	2.556
okadaic acid	1.39E-02	-0.470
quercetin	1.41E-02	0.489
phosphate	1.41E-02	-0.288
desmopressin	1.41E-02	-0.870
CAV1	1.42E-02	-0.757
mir-223	1.44E-02	-2.098
methylmercury	1.45E-02	0.728
Calcineurin protein(s)	1.47E-02	-0.032
SERPINF1	1.47E-02	-0.926
fingolimod	1.47E-02	2.309
hyodeoxycholic acid	1.47E-02
1-methyl-2-pyrrolidinone	1.47E-02
Meg3	1.47E-02
GLIPR2	1.47E-02
VLDL	1.47E-02
PPP1R1B	1.47E-02
KCNJ2	1.47E-02
GALNS	1.47E-02
ACP1	1.47E-02
Nppb	1.47E-02
TIAM1	1.47E-02
DLL3	1.47E-02
KCNJ9	1.47E-02
LAMP2	1.47E-02
VLDLR	1.47E-02
CACNA2D1	1.47E-02
SH2B3	1.47E-02
GDF5	1.47E-02
CMA1	1.47E-02
XPO1	1.47E-02
CFL1	1.47E-02
GFAP	1.47E-02
PLCL1	1.47E-02
ADAM9	1.47E-02
SCIN	1.47E-02
LRRC8C	1.47E-02
RASA1	1.47E-02
MAD1L1	1.47E-02
SERPINH1	1.47E-02
NTRK3	1.47E-02
griseofulvin	1.47E-02
5,6,7,8-tetrahydrobiopterin	1.47E-02
ibotenic acid	1.47E-02
glabridin	1.47E-02
nandrolone decanoate	1.47E-02
testosterone cypionate	1.47E-02
4-methylcatechol	1.47E-02
jasplakinolide	1.47E-02
bisindolylmaleimide II	1.47E-02
resiniferatoxin	1.47E-02
palmitoleic acid	1.47E-02
tetrachlorodibenzodioxin	1.47E-02	-1.512
tert-butyl-hydroquinone	1.54E-02	-2.314
ritonavir	1.55E-02	-0.631
ISG15	1.56E-02	1.987
MED28	1.56E-02	1.957
miR-320b (and other miRNAs w/seed AAAGCUG)	1.56E-02	1.941
IGFBP4	1.56E-02	1.199
GNMT	1.56E-02	1.131
24(S),25-epoxycholesterol	1.56E-02	1.067
GRM5	1.56E-02	-0.068
raclopride	1.56E-02	-0.277
S1PR3	1.56E-02	-0.849
PARP	1.56E-02
Ampa Receptor	1.56E-02
CBX1	1.56E-02
mir-194	1.56E-02
thenoyltrifluoroacetone	1.56E-02	2.000
RBCK1	1.56E-02	-2.000
NPPB	1.56E-02	0.484
proteasome inhibitor PSI	1.56E-02	-2.538
MGAT5	1.62E-02	1.095
COL9A1	1.62E-02	0.592
BAG1	1.62E-02	0.422
octanoic acid	1.62E-02	0.294
S100B	1.62E-02	-0.152
NCOA6	1.62E-02	-0.218
MDK	1.62E-02	-0.555
PDGFRA	1.62E-02
xanthohumol	1.65E-02	0.239
HRG	1.65E-02	-0.853
Raf	1.65E-02	-1.744
AGN194204	1.71E-02	-4.253
pitavastatin	1.71E-02	1.256
2,3 butanedione monoxime	1.71E-02	0.518
CD9	1.71E-02	-0.674
UBE3A	1.71E-02	-0.988
acetaldehyde	1.71E-02	-1.534
mezerein	1.71E-02
TWIST2	1.71E-02	-2.234
cis-urocanic acid	1.71E-02	-2.621
N-[N-(3,5-difluorophenacetyl-L-Ala)]-S-phenylglycine t-butyl ester	1.72E-02	1.195
AXIN1	1.72E-02	0.570
carvedilol	1.72E-02	0.000
NOTCH4	1.72E-02	-0.272
TF	1.72E-02	-0.730
NLRC5	1.72E-02	-2.584
MAP2K6	1.74E-02	-0.566
MMP9	1.75E-02	-0.401
SUMO3	1.81E-02	1.508
NOS3	1.81E-02	0.419
7-ethyl-10-hydroxy-camptothecin	1.81E-02	-1.118
SU6656	1.81E-02	2.550
NEUROD1	1.81E-02	2.236
JAK2	1.82E-02	-2.992
VIP	1.83E-02	1.675
26s Proteasome	1.91E-02	0.082
STAT1	1.96E-02	-4.096
EPHB4	1.96E-02	-1.604
1-methyl-4-phenyl-1,2,3,6-tetrahydropyridine	1.97E-02	-1.651
PTGER2	1.98E-02	1.091
S-adenosylmethionine	1.98E-02	2.017
TSC2	2.02E-02	0.976
KLF15	2.02E-02	-0.000
F2RL1	2.02E-02	-2.571
ELK3	2.12E-02	1.997
PTP4A3	2.12E-02	1.231
beta-cyclodextrin	2.12E-02	0.600
LXR ligand-LXR-Retinoic acid-RXRα	2.12E-02	0.327
HAS2	2.12E-02	-0.391
ALOX12	2.12E-02	-0.447
sorbitol	2.12E-02	-0.833
miR-217-5p (and other miRNAs w/seed ACUGCAU)	2.12E-02	-1.172
Nos	2.12E-02	-1.387
Rac	2.12E-02
Nrg1	2.12E-02
SOCS2	2.12E-02
tetrathiomolybdate	2.12E-02	2.236
salubrinal	2.12E-02	-2.213
CTNNβ-TCF/LEF	2.12E-02	-2.219
diazoxide	2.13E-02	0.000
ASAH1	2.13E-02	-0.198
MEF2A	2.13E-02	-0.318
vitamin K3	2.13E-02	-0.780
butylated hydroxyanisol	2.13E-02	-0.862
PLIN5	2.13E-02	-0.923
EP300	2.14E-02	-1.248
TLR3	2.14E-02	-4.643
NR0B2	2.16E-02	-0.504
RXRA	2.17E-02	1.468
candesartan	2.19E-02	2.234
RBM5	2.19E-02	2.042
genistein	2.21E-02	1.116
mir-27	2.24E-02	0.222
staurosporine	2.28E-02	0.075
A23187	2.28E-02	-1.941
lithium	2.31E-02	-0.729
IRAK4	2.31E-02
ADRA1A	2.33E-02
DDX58	2.33E-02	-2.064
6-ethylchenodeoxycholic acid	2.33E-02	0.963
SLC18A3	2.33E-02	0.160
HOXB4	2.33E-02	0.000
MAPK8IP1	2.33E-02	-0.129
leupeptin	2.33E-02	-0.371
reserpine	2.33E-02	-0.656
cuprizone	2.33E-02	-0.728
WWTR1	2.33E-02	-2.449
KLF4	2.34E-02	-2.556
W7	2.35E-02	0.785
calyculin A	2.35E-02	0.128
Rp-cAMPS	2.35E-02	0.059
IHH	2.35E-02	-0.388
CYP27A1	2.35E-02	-0.478
SMAD5	2.35E-02	-0.739
Angiotensin II receptor type 1	2.35E-02	-0.894
IGFBP5	2.35E-02	-1.363
ETV1	2.35E-02	-1.768
IL15	2.39E-02	-2.250
mir-21	2.40E-02	1.223
MAP2K1/2	2.43E-02	-1.126
EGR3	2.45E-02	0.093
KMT2A	2.45E-02	0.000
CALR	2.45E-02	-0.679
APOA1	2.45E-02	2.057
ALB	2.45E-02	-2.003
cyclopamine	2.47E-02	0.825
2,4-dinitrophenol-ovalbumin conjugate	2.47E-02	0.632
Fgf	2.47E-02	-0.833
A2M	2.47E-02	-1.667
4-hydroxynonenal	2.47E-02	-2.182
TWIST1	2.51E-02	-2.794
INS	2.54E-02	-0.878
palmitic acid	2.57E-02	-2.522
TICAM1	2.57E-02	-4.470
12-(3-adamantan-1-yl-ureido) dodecanoic acid	2.57E-02	0.069
NRG2	2.57E-02
5,6-epoxyeicosatrienoic acid	2.59E-02
gentamicin C1	2.59E-02
ginsenoside Rh2	2.59E-02
AMOT	2.59E-02
Tap	2.59E-02
TGFBR	2.59E-02
15-LOX	2.59E-02
Pdgfra-Pdgfrb	2.59E-02
RAR-RXR	2.59E-02
AMG-9810	2.59E-02
Rbp	2.59E-02
acyline	2.59E-02
l9Rl3	2.59E-02
SOCS7	2.59E-02
RETSAT	2.59E-02
GPR4	2.59E-02
FEZF2	2.59E-02
CDCA7L	2.59E-02
CLASP2	2.59E-02
ZNF608	2.59E-02
betulin	2.59E-02
Raet1a	2.59E-02
Hat	2.59E-02
PTPase	2.59E-02
ACAT1	2.59E-02
OMG	2.59E-02
ADI PEG20	2.59E-02
INTERLEUKIN	2.59E-02
TRDN	2.59E-02
GFRA1	2.59E-02
CTS-1027	2.59E-02
PRKG2	2.59E-02
HOXB8	2.59E-02
MAPK8IP2	2.59E-02
KCNJ5	2.59E-02
PURB	2.59E-02
NMB	2.59E-02
ARID5B	2.59E-02
mir-127	2.59E-02
mir-326	2.59E-02
miR-489-3p (miRNAs w/seed UGACAUC)	2.59E-02
RILP	2.59E-02
HCRT	2.59E-02
SLC8A1	2.59E-02
Raet1d/Raet1e	2.59E-02
COL7A1	2.59E-02
GRIA1	2.59E-02
WWP1	2.59E-02
TOR2A	2.59E-02
RGS3	2.59E-02
Hnrpfl	2.59E-02
RNF139	2.59E-02
Eng	2.59E-02
GAS1	2.59E-02
EGFL7	2.59E-02
SERPINB7	2.59E-02
AKAP13	2.59E-02
STAMBP	2.59E-02
ADAMTS5	2.59E-02
RACGAP1	2.59E-02
EVC	2.59E-02
Dtnbp1	2.59E-02
LAMB2	2.59E-02
SCT	2.59E-02
3-iodobenzylguanidine	2.59E-02
tianeptine	2.59E-02
marimastat	2.59E-02
sarpogrelate	2.59E-02
methiothepin	2.59E-02
gabazine	2.59E-02
alcohol	2.59E-02
hexaarginine-neomycin B conjugate	2.59E-02
tramadol	2.59E-02
felodipine	2.59E-02
gamma tocopherol	2.59E-02
zoptarelin doxorubicin	2.59E-02
Z-LEHD-FMK	2.59E-02
teleocidins	2.59E-02
KT 5926	2.59E-02
oleylamide	2.59E-02
15-hydroxyeicosatetraenoic acid	2.59E-02
polyinosinic acid	2.59E-02
KB-R7785	2.59E-02
5-thio-D-glucose	2.59E-02
tibolone	2.59E-02
17-epiestriol	2.59E-02
flunisolide	2.59E-02
sulindac sulfide	2.61E-02	0.152
IGFBP2	2.62E-02	-1.863
PTGES	2.62E-02
RUNX2	2.62E-02	-0.900
bezafibrate	2.64E-02	-1.868
NGFR	2.71E-02	1.432
tetrodotoxin	2.71E-02	-1.166
PBX1	2.71E-02
mir-515	2.72E-02	1.997
miR-199a-3p (and other miRNAs w/seed CAGUAGU)	2.72E-02	1.987
PLP2	2.72E-02	1.000
UTS2R	2.72E-02	1.000
bicuculline	2.72E-02	1.000
EN1	2.72E-02	0.849
NPC1L1	2.72E-02	0.000
1L-6-hydroxymethyl-chiro-inositol 2-(R)-2-O-methyl-3-O-octadecylcarbonate	2.72E-02	-1.067
levetiracetam	2.72E-02	-1.067
asbestos	2.72E-02	-1.091
SCUBE3	2.72E-02	-1.131
desoxycorticosterone	2.72E-02	-1.940
LIMS1	2.72E-02	-1.987
triclosan	2.72E-02
POU3F3	2.72E-02
NUP155	2.72E-02
CDKN3	2.72E-02
PBX2	2.72E-02
diltiazem	2.72E-02
RP 73401	2.72E-02
RGS19	2.72E-02	2.000
motexafin gadolinium	2.72E-02	-2.000
PTGES3	2.72E-02	-2.000
SUMO2	2.74E-02	1.508
K+	2.74E-02	-0.092
IRS2	2.74E-02	-0.380
OLR1	2.74E-02	-2.191
IL6ST	2.75E-02	-1.522
NKX3-1	2.75E-02
miR-34a-5p (and other miRNAs w/seed GGCAGUG)	2.75E-02	2.666
MAP3K7	2.83E-02	-0.933
reactive oxygen species	2.83E-02	-2.222
NR4A2	2.85E-02	0.509
ceramide	2.93E-02	1.129
trabectedin	2.93E-02	0.961
HSD17B4	2.93E-02	0.647
dexamethasone phosphate	2.93E-02	-0.378
amitriptyline	2.93E-02	-1.238
GAB2	2.93E-02	-1.977
Ni2+	2.93E-02	-2.100
S-nitrosoglutathione	2.95E-02	0.245
FGF7	2.96E-02	-2.797
TNFRSF1B	2.99E-02	-2.520
3,4,5,3',4'-pentachlorobiphenyl	3.00E-02	-1.364
homocysteine	3.00E-02	-1.244
Ins1	3.01E-02	-1.988
lipoxin A4	3.05E-02	1.189
NOTCH3	3.05E-02	0.069
green tea polyphenol	3.05E-02	0.018
MEN1	3.05E-02	-0.586
SSRP1	3.05E-02
CDK4	3.10E-02
HES1	3.10E-02	-1.364
ADRA1B	3.10E-02
ADRA1D	3.10E-02
LPIN1	3.12E-02	1.977
ELOVL5	3.12E-02	0.973
cannabidiol	3.12E-02	0.610
SCXA/SCXB	3.12E-02	-0.346
EED	3.12E-02
15(S)-HETE	3.17E-02	1.387
OSBPL8	3.17E-02	1.342
miR-19b-3p (and other miRNAs w/seed GUGCAAA)	3.17E-02	1.287
SMURF2	3.17E-02	1.000
STAR	3.17E-02	0.577
RLN2	3.17E-02	0.294
miR-9-5p (and other miRNAs w/seed CUUUGGU)	3.17E-02	0.210
progestin	3.17E-02	0.000
CLCA2	3.17E-02	-0.063
PLC	3.17E-02	-0.447
NPPC	3.17E-02	-0.447
xanthine	3.17E-02	-1.069
CX3CL1	3.17E-02	-1.934
SATB2	3.17E-02	-1.972
FH	3.17E-02
ELK4	3.17E-02
dimethyl fumarate	3.17E-02
metoprolol	3.17E-02	2.236
trientine	3.17E-02	2.224
Zn2+	3.17E-02	-2.169
STAT1/3/5 dimer	3.17E-02	-2.219
tunicamycin	3.17E-02	-0.935
Gsk3	3.22E-02	-2.562
chondroitin sulfate	3.23E-02
S-18886	3.23E-02
norethindrone acetate	3.23E-02
hesperidin	3.23E-02
BICC1	3.23E-02
ACTA2	3.23E-02
YY2	3.23E-02
Gpcr	3.23E-02
AHI1	3.23E-02
Gata	3.23E-02
ZNF521	3.23E-02
HSPB2	3.23E-02
PAPPA	3.23E-02
mir-183	3.23E-02
miR-346 (and other miRNAs w/seed GUCUGCC)	3.23E-02
mir-142	3.23E-02
DRD5	3.23E-02
MYCT1	3.23E-02
ARSA	3.23E-02
NME3	3.23E-02
LHX6	3.23E-02
PSMD4	3.23E-02
RTKN	3.23E-02
BRMS1	3.23E-02
SGCD	3.23E-02
HIVEP2	3.23E-02
TCL1A	3.23E-02
LMO1	3.23E-02
PLAA	3.23E-02
ACTN4	3.23E-02
CLDN2	3.23E-02
2-cyclohexen-1-one	3.23E-02
LY379196	3.23E-02
clopidogrel	3.23E-02
warfarin	3.23E-02
ifenprodil	3.23E-02
butylated hydroxytoluene	3.23E-02
papaverine	3.23E-02
Z-IETD-FMK	3.23E-02
ceftriaxone	3.23E-02
3-nitrotyrosine	3.23E-02
methyltestosterone	3.23E-02
Cr6+	3.23E-02
amlodipine	3.23E-02	1.633
2-arachidonoylglycerol	3.23E-02	0.447
NMDA Receptor	3.23E-02	-0.128
mannitol	3.23E-02	-0.798
NADPH oxidase	3.23E-02	-1.528
LYL1	3.23E-02	-1.960
ACACB	3.23E-02	-1.982
peroxynitrite	3.23E-02	-2.433
APC	3.29E-02	0.362
steroid	3.31E-02	0.263
propranolol	3.31E-02	-0.204
SQSTM1	3.31E-02	-1.819
FMR1	3.31E-02	-3.181
POMC	3.33E-02	-0.668
L-glutamic acid	3.33E-02	-0.843
HOXA7	3.38E-02	0.213
ILK	3.38E-02	-0.886
ETV4	3.38E-02	-1.866
SETDB1	3.38E-02
tempol	3.38E-02	2.828
mir-210	3.39E-02	1.149
cyclophosphamide	3.39E-02	-1.573
MBD3	3.40E-02
THRB	3.40E-02	1.330
ANGPT2	3.47E-02	-2.229
EZH2	3.47E-02	0.967
BRCA1	3.48E-02	0.370
thioctic acid	3.65E-02	0.895
FASLG	3.71E-02	-0.885
DTX1	3.72E-02	1.463
CTBP1	3.72E-02	0.555
NCOR-LXR-Oxysterol-RXR-9 cis RA	3.72E-02	0.216
linolenic acid	3.72E-02	0.152
diphenyleneiodonium	3.75E-02	3.665
trichloroethylene	3.82E-02	1.291
benzene	3.82E-02	1.291
GCG	3.82E-02	0.029
alitretinoin	3.82E-02	-0.560
RARB	3.85E-02	-1.245
cadmium	3.86E-02	-2.251
IRF5	3.87E-02	-2.494
BAPTA-AM	3.96E-02	1.693
chloropromazine	3.96E-02	-0.981
eflornithine	3.96E-02	-2.709
GSTP1	3.98E-02
CD24	3.99E-02	-0.351
dimethyl sulfoxide	4.01E-02	-0.601
mir-22	4.05E-02	1.302
GLP-1-(7-34)-amide	4.05E-02	-0.587
NTRK1	4.05E-02	-1.000
OXT	4.05E-02	-1.634
EDN3	4.05E-02	-2.449
PDGFC	4.05E-02	-2.619
miR-16-5p (and other miRNAs w/seed AGCAGCA)	4.08E-02	3.912
ARNT2	4.10E-02	-1.677
EBI3	4.14E-02	-1.601
PTX3	4.16E-02	0.857
RPSA	4.16E-02	0.781
IFRD1	4.16E-02	0.594
taurine	4.16E-02	0.495
Focal adhesion kinase	4.16E-02	-0.735
muscimol	4.28E-02	1.154
phenyl-N-tert-butylnitrone	4.28E-02	0.887
AGRN	4.28E-02	0.278
scopolamine	4.28E-02	0.187
FOXN1	4.28E-02	0.132
11-dehydrocorticosterone	4.28E-02	0.000
ACHE	4.28E-02	0.000
MEMO1	4.28E-02	-0.061
LPA	4.28E-02	-0.110
APC/APC2	4.28E-02	-0.218
SOX8	4.28E-02	-0.655
Bcl9-Cbp/p300-Ctnnb1-Lef/Tcf	4.28E-02	-0.762
aurothioglucose	4.28E-02	-0.762
APLNR	4.28E-02	-1.000
PEA15	4.28E-02	-1.000
sphingomyelin	4.28E-02	-1.000
cholesterol sulfate	4.28E-02	-1.131
SRY	4.28E-02	-1.273
PRRX1	4.28E-02	-1.960
mesalamine	4.28E-02	-1.964
tannic acid	4.28E-02
H2AFZ	4.28E-02
HPSE	4.28E-02
S100P	4.28E-02
benazepril	4.28E-02
L-N6-(1-iminoethyl)-lysine	4.28E-02
beraprost	4.28E-02	2.000
SERPINB2	4.28E-02	2.000
YWHAQ	4.28E-02	-2.000
paraquat	4.31E-02	0.052
glutamyl-Se-methylselenocysteine	4.34E-02	1.633
oxymatrine	4.34E-02	1.067
FKBP4	4.34E-02	0.492
Gnas	4.34E-02	-0.277
BMP15	4.34E-02	-0.557
PARP9	4.34E-02	-0.896
Endothelin	4.34E-02	-1.016
thiazolidinedione	4.34E-02	-1.067
ADRB3	4.34E-02	-1.095
NCAM1	4.34E-02	-1.698
SP100	4.34E-02
T	4.34E-02	-2.449
BIRC5	4.34E-02
ascorbic acid	4.36E-02	0.170
propofol	4.47E-02	0.288
FOSL2	4.47E-02	-0.416
ZIC3	4.48E-02	0.762
pentylenetetrazol	4.48E-02	0.162
silicon dioxide	4.48E-02	-0.555
PTGER1	4.48E-02	-1.091
IDH2	4.48E-02
CBX2	4.48E-02
BARX2	4.48E-02
pirfenidone	4.48E-02	2.200
prazosin	4.48E-02	2.000
SPRY1	4.48E-02	-2.219
SOD2	4.60E-02	0.113
FHL2	4.64E-02	0.586
SFRP1	4.64E-02	-0.066
RXRG	4.64E-02
ADAMTS12	4.64E-02	2.646
fenofibrate	4.67E-02	-0.044
GLI2	4.69E-02	0.274
MTA1	4.70E-02	0.773
ONECUT1	4.85E-02
SATB1	4.86E-02	0.206
TBX2	4.91E-02	2.183
HDAC3	4.99E-02	0.842
PRKCB	4.99E-02	-1.556
MAP2K4	4.99E-02	-1.673
MAP2K7	4.99E-02
di(2-ethylhexyl) phthalate	4.99E-02	-2.115
MAPK3	5.00E-02	-1.910
KNG1	5.05E-02	-2.987
E. coli B5 lipopolysaccharide	5.11E-02	-4.348
metformin	5.54E-02	3.653
mir-155	5.58E-02	2.129
GNA12	5.58E-02	-2.126
platelet activating factor	5.63E-02	-2.045
ARHGDIG	5.65E-02	2.449
salicylic acid	5.69E-02	1.780
picrotoxin	5.69E-02	-2.121
TRADD	5.69E-02	-2.121
SOCS1	5.70E-02	1.918
EREG	6.07E-02	-1.981
ACTB	6.07E-02	2.000
SIM1	6.11E-02	-2.015
mir-373	6.25E-02	1.993
tranylcypromine	6.25E-02	1.969
Retnla	6.25E-02	-1.953
ryanodine	6.25E-02	-1.980
RLIM	6.25E-02	-2.000
2-aminopurine	6.40E-02	2.583
NOX4	6.40E-02	-2.177
TNFRSF1A	6.41E-02	-1.944
ETV5	6.43E-02	-2.414
9,10-dimethyl-1,2-benzanthracene	6.43E-02	-2.437
miR-291a-3p (and other miRNAs w/seed AAGUGCU)	6.51E-02	2.668
etoposide	6.55E-02	-1.859
Sb202190	6.58E-02	3.960
CDK9	6.89E-02	-1.961
miR-141-3p (and other miRNAs w/seed AACACUG)	6.89E-02	2.785
ADORA2A	6.92E-02	2.188
PS-1145	7.17E-02	2.401
GABPB1	7.17E-02	-2.213
mir-29	7.19E-02	1.939
minocycline	7.33E-02	2.201
MSTN	7.36E-02	-2.945
PTPRJ	7.41E-02	-2.887
IL12B	7.41E-02	-3.255
CAT	7.45E-02	3.411
NFE2L2	7.51E-02	-1.862
geranylgeranyl pyrophosphate	7.83E-02	-1.751
F3	7.83E-02	-2.228
ACOX1	7.86E-02	2.501
wogonin	7.94E-02	1.964
CYP7A1	7.94E-02	2.236
1-naphthylisothiocyanate	7.94E-02	-2.000
concanamycin A	7.94E-02	-2.181
VCAN	7.94E-02	-2.219
PTPRE	7.94E-02	-2.236
PCGF2	8.23E-02	1.878
sodium chloride	8.25E-02	-2.155
C5	8.28E-02	-3.135
miR-21-5p (and other miRNAs w/seed AGCUUAU)	8.38E-02	2.399
Ccl2	8.38E-02	-2.062
PLAUR	8.44E-02	-2.029
HSF4	8.61E-02	1.969
triptorelin	8.61E-02	1.889
tert-butyl hydroperoxide	8.61E-02	-1.960
Integrin	8.61E-02	-1.969
ZBTB17	8.90E-02	-2.000
IFN Beta	8.98E-02	-4.041
ciprofibrate	9.06E-02	-3.228
IFNAR1	9.29E-02	-2.179
acetaminophen	9.39E-02	-1.808
alefacept	9.43E-02	2.025
S100A9	9.43E-02	-1.982
ARRB2	9.43E-02	2.236
TRPV4	9.43E-02	-2.606
ionomycin	9.55E-02	-1.955
cigarette smoke	9.68E-02	-3.113
SASH1	9.75E-02	-3.000
D609	1.01E-01	2.207
superoxide	1.01E-01	-2.000
PRMT5	1.01E-01	-2.156
IFNA1/IFNA13	1.03E-01	-3.087
KITLG	1.05E-01	-2.464
CTSS	1.08E-01	-2.000
VitaminD3-VDR-RXR	1.10E-01	-2.234
mir-8	1.12E-01	1.850
betulinic acid	1.12E-01	2.200
SAA	1.12E-01	-2.564
NfkB1-RelA	1.12E-01	-2.591
paricalcitol	1.13E-01	2.813
PLG	1.13E-01	-2.567
TFEB	1.13E-01	-2.800
ginsenoside Rb1	1.13E-01	1.982
SPINT2	1.13E-01	1.969
Fgfr	1.13E-01	-2.000
APOC3	1.13E-01	-2.000
NFATC1	1.18E-01	-2.097
CD14	1.21E-01	-2.939
IFN type 1	1.24E-01	-1.905
USP18	1.25E-01	2.236
CREB3L1	1.25E-01	-2.219
FOXO4	1.27E-01	-1.884
desipramine	1.30E-01	1.791
IFNAR2	1.30E-01	-2.449
NFATC3	1.30E-01	-2.135
S-nitroso-N-acetyl-DL-penicillamine	1.31E-01	-1.937
AICAR	1.39E-01	2.106
IL27	1.39E-01	-2.319
STK11	1.39E-01	-3.144
FOXA2	1.42E-01	3.286
lipid A	1.43E-01	-2.333
isoquercitrin	1.44E-01	1.980
SMURF1	1.44E-01	1.964
mevastatin	1.44E-01	1.829
LPAR1	1.44E-01	-1.964
ITGB6	1.44E-01	-1.969
leukotriene C4	1.44E-01	-1.997
CYP51A1	1.44E-01	-2.000
gentamicin	1.45E-01	-2.661
GABPA	1.46E-01	-2.229
SAMSN1	1.47E-01	-2.524
NFYA	1.48E-01	-2.537
ITGA2	1.51E-01	-2.219
ELF3	1.53E-01	-1.974
diallyl disulfide	1.53E-01	-2.189
LGALS1	1.60E-01	-3.094
SREBF2	1.60E-01	2.724
IL12 (complex)	1.67E-01	-3.085
pentoxifylline	1.70E-01	2.178
PRKD1	1.74E-01	-1.915
methylnitronitrosoguanidine	1.74E-01	-2.556
PLAGL1	1.77E-01	-1.981
Mn(III)-tetrakis-(4-benzoic acid) porphyrin	1.77E-01	2.000
phorbol esters	1.78E-01	-2.450
BNIP3L	1.80E-01	-2.309
TET2	1.84E-01	-2.333
mercuric chloride	1.91E-01	-2.216
FOXO3	1.92E-01	-1.950
ADA	2.04E-01	1.969
mir-132	2.04E-01	-1.982
S100A8	2.04E-01	-2.000
arsenic trioxide	2.05E-01	-3.394
HBB	2.06E-01	-1.890
IFN alpha/beta	2.08E-01	-2.776
CYP2E1	2.09E-01	-2.211
1'-acetoxychavicol acetate	2.12E-01	2.000
ellagic acid	2.12E-01	-2.000
carbenoxolone	2.12E-01	-2.000
SPI1	2.17E-01	-1.989
SOCS3	2.18E-01	2.132
CGS 21680	2.22E-01	1.793
Fc gamma receptor	2.22E-01	-1.890
CCL11	2.25E-01	-2.749
CD2	2.26E-01	-2.969
DOCK8	2.28E-01	-2.673
EIF2AK3	2.33E-01	-1.833
EGTA	2.36E-01	1.941
PRKCE	2.39E-01	-1.869
bafilomycin A1	2.41E-01	-2.200
SREBF1	2.42E-01	2.031
CGB (includes others)	2.50E-01	-1.961
MST1R	2.50E-01	-1.980
PTHLH	2.51E-01	-2.592
FOXO1	2.57E-01	-1.858
CYLD	2.60E-01	-1.935
TNFSF12	2.67E-01	-3.641
SELPLG	2.75E-01	-1.890
mir-146	2.75E-01	2.433
erlotinib	2.75E-01	2.236
clofibrate	2.77E-01	-1.970
NR1I3	2.80E-01	-3.885
TLR9	2.84E-01	-3.462
ATP7B	2.85E-01	2.121
MAP3K14	2.85E-01	-2.433
acyclic retinoid	2.88E-01	1.980
N(6)-(3-iodobenzyl)-5'-N-methylcarboxamidoadenosine	2.88E-01	1.974
vanadate	2.88E-01	1.974
tranilast	2.88E-01	1.969
TNFSF14	2.88E-01	-1.963
SIRT2	2.88E-01	2.000
BID	2.88E-01	-2.000
IFI16	2.90E-01	-1.892
CCL2	2.90E-01	-3.028
CDH11	2.90E-01	-2.433
Gm-csf	3.00E-01	-1.937
Bay 11-7082	3.00E-01	2.573
CpG oligonucleotide	3.01E-01	-3.448
SELP	3.02E-01	-1.913
NfkB-RelA	3.07E-01	-2.232
IFNK	3.07E-01	-2.236
MBP	3.07E-01	-2.236
ICAM1	3.10E-01	-2.146
resiquimod	3.20E-01	-2.389
methyl 2-cyano-3,12-dioxoolean-1,9-dien-28-oate	3.20E-01	1.751
TRAF6	3.22E-01	-3.130
ouabain	3.29E-01	-2.406
RUNX3	3.41E-01	1.980
HSPD1	3.42E-01	-2.194
SCAP	3.45E-01	1.873
trinitrobenzenesulfonic acid	3.57E-01	-3.332
Ncoa-Nr1i2-Rxra	3.67E-01	-2.000
MAVS	3.68E-01	-2.558
1,4-bis[2-(3,5-dichloropyridyloxy)]benzene	3.75E-01	-2.505
pirinixic acid	3.75E-01	-2.878
PLK4	3.76E-01	-2.236
EPO	3.81E-01	-1.833
GPX1	3.88E-01	2.619
FLT3LG	3.90E-01	-1.795
Tlr	3.91E-01	-3.949
COMMD1	4.06E-01	1.982
chelerythrine	4.06E-01	2.000
ERVW-1	4.06E-01	-2.000
fisetin	4.10E-01	1.982
B2M	4.10E-01	-1.982
PLK2	4.10E-01	-2.236
ELF4	4.13E-01	-2.236
Pam3-Cys	4.14E-01	-1.948
Gh	4.38E-01	-2.125
niacinamide	4.42E-01	2.425
XBP1	4.43E-01	-1.799
JAK3	4.43E-01	-2.000
PRKAA	4.45E-01	1.982
zinc	4.51E-01	-2.583
chromium	4.63E-01	2.339
BAX	4.63E-01	-2.157
IL1R1	4.67E-01	-2.390
TNFAIP3	4.70E-01	1.915
CCR5	4.70E-01	-1.801
MMP14	4.78E-01	-1.959
ZFP36	4.82E-01	1.954
LTBP1	4.82E-01	-1.980
seocalcitol	4.84E-01	-1.897
TNFSF13B	4.92E-01	-2.128
NRF1	4.92E-01	-2.138
3-methylcholanthrene	4.92E-01	-2.504
IL18	4.96E-01	-2.607
PXR ligand-PXR-Retinoic acid-RXRα	4.97E-01	-1.866
CYBB	5.11E-01	-2.236
miR-221-3p (and other miRNAs w/seed GCUACAU)	5.19E-01	1.989
IFNE	5.33E-01	-2.433
miR-200b-3p (and other miRNAs w/seed AAUACUG)	5.55E-01	1.994
dehydroisoandrosterone	1.00E00	1.970
etanercept	1.00E00	1.960
CD3E	1.00E00	1.951
CD247	1.00E00	1.890
pregnenolone carbonitrile	1.00E00	-1.767
ITK	1.00E00	-1.806
peptidoglycan	1.00E00	-1.884
TLR5	1.00E00	-1.964
LYN	1.00E00	2.800
miR-483-3p (miRNAs w/seed CACUCCU)	1.00E00	2.627
miR-146a-5p (and other miRNAs w/seed GAGAACU)	1.00E00	2.412
apigenin	1.00E00	2.207
glutamine	1.00E00	2.138
panobinostat	1.00E00	2.000
PTPN6	1.00E00	2.000
RNASE2	1.00E00	-2.000
HNF1B	1.00E00	-2.000
TYROBP	1.00E00	-2.000
imiquimod	1.00E00	-2.029
CD5	1.00E00	-2.138
bromobenzene	1.00E00	-2.177
HMGA1	1.00E00	-2.186
TMEM173	1.00E00	-2.236
PIN1	1.00E00	-2.236
BCR (complex)	1.00E00	-2.258
5-fluorouracil	1.00E00	-2.377
TLR2	1.00E00	-2.461
IL12A	1.00E00	-2.791
NR1I2	1.00E00	-2.873
TBK1	1.00E00	-2.959
1,2-dithiol-3-thione	1.00E00	-3.009
phenobarbital	1.00E00	-3.071
E. coli lipopolysaccharide	1.00E00	-3.095
HNF1A	1.00E00	-3.403
